# Supplementary material for: A two-folds deep learning strategy to correct and downscale winds over mountains
Source: Copernicus journal article supplement (doi:10.5194/npg-2023-10), 2023-05-10
Supplement: Supplementary file 1 [file npg-2023-10-supplement.pdf]

# Supplementary material

Louis Le Toumelin<sup>1</sup>, Isabelle Gouttevin<sup>1</sup>, Clovis Galiez<sup>2</sup>, and Nora Helbig<sup>3, 4</sup>

<sup>1</sup>Univ. Grenoble Alpes, Université de Toulouse, Météo-France, CNRS, CNRM, Centre d'Études de la Neige, Grenoble, France

<sup>2</sup>Univ. Grenoble Alpes, CNRS, Grenoble INP\*, LJK, 38000 Grenoble, France \*Institute of Engineering Univ. Grenoble Alpes

<sup>3</sup>WSL Institute for Snow and Avalanche Research SLF, Davos, Switzerland

<sup>4</sup>Eastern Switzerland University of Applied Sciences, Rapperswil, Switzerland

**Correspondence:** Louis Le Toumelin (louis.letoumelin@gmail.com)

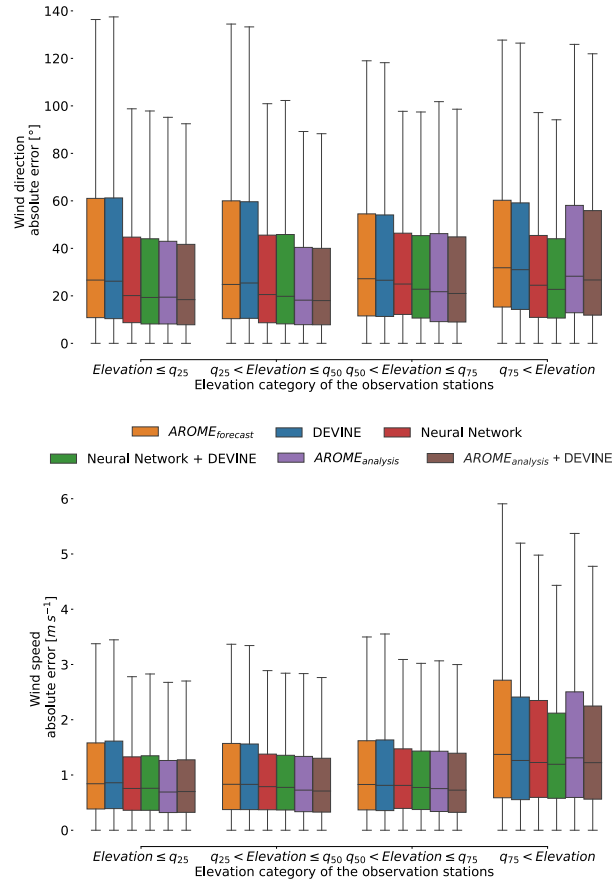

**Figure S1.** Wind direction absolute error (a) and wind speed absolute error (b) categorized by the elevation of the observation station where the measurements were held. In details, the four categories correspond to the four quartiles of the elevation distribution among observation stations: elevation increases from left to right. Each boxplot color indicates a different model. This figure is similar to Fig. 6 in the main manuscript but also includes AROME<sub>analysis</sub> + DEVINE model. This model corresponds to outputs of DEVINE forced by AROME<sub>analysis</sub>. This figure only uses data from the test set.
